# Supplementary material for: Formation of Lymphoma Hybrid Spheroids and Drug Testing in Real Time with the Use of Fluorescence Optical Tweezers
Source: MDPI journal article supplement (doi:10.3390/cells11132113), 2022-07-05
Supplement: s1 [file s1]

Article

# Supplementary Materials. Formation of Lymphoma Hybrid Spheroids and Drug Testing in Real-time with the Use of Fluorescence Optical Tweezers.

Kamila Duś-Szachniewicz , Katarzyna Gdesz-Birula , Emilia Nowosielska , Piotr Ziółkowski and Sławomir Drobczyński

## Supplementary Figures

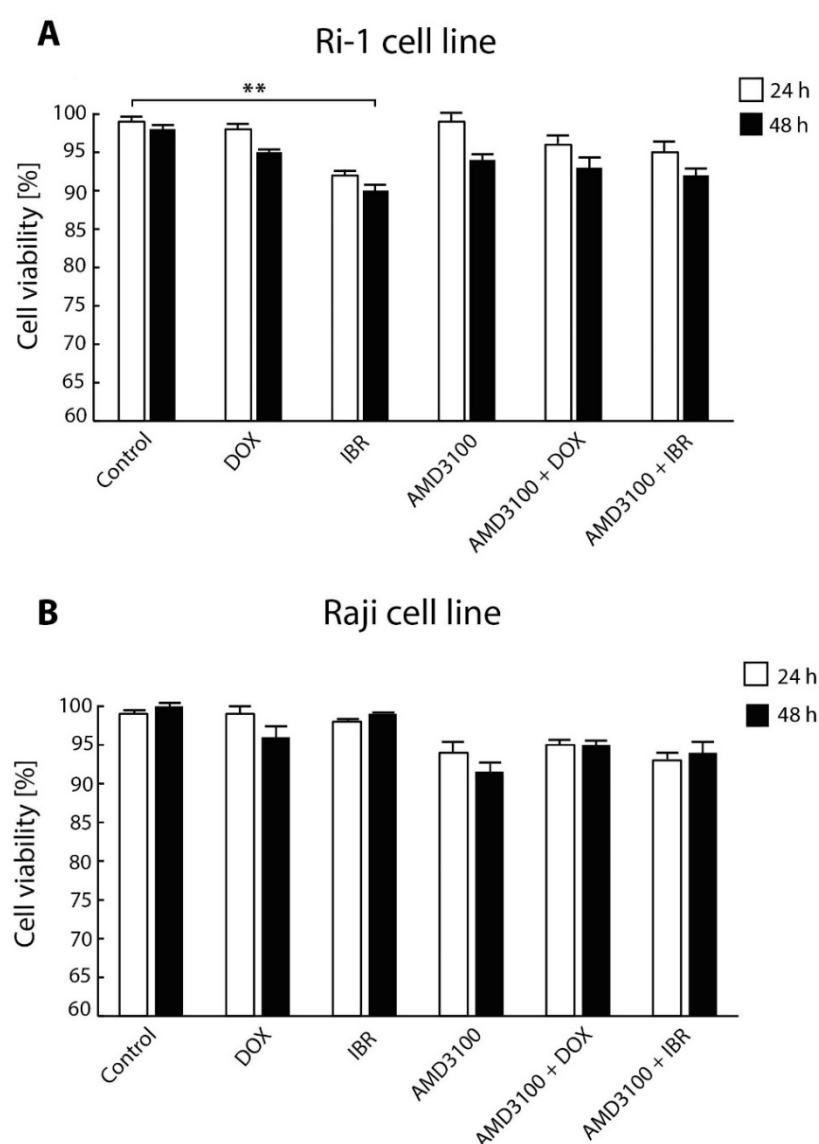

**Figure S1.** The effect of the anticancer treatment on the viability of Ri-1 (A) and RAJI (B) cell lines. Error bars represent the standard error of the mean calculated from three independent measurements, \*\* $p$ -value < 0.01. DOX, doxorubicin, IBR, ibrutinib.
