# Supplementary material for: Formation of Lymphoma Hybrid Spheroids and Drug Testing in Real Time with the Use of Fluorescence Optical Tweezers
Source: MDPI journal article supplement (doi:10.3390/cells11132113), 2022-07-05
Supplement: s1 [file s1]

Archive with 3 entries (3 files):
- Figure S1.pdf
- Video S1.mp4
- Video S2.mp4
